# Supplementary material for: Regional fresh snowfall microbiology and chemistry are driven by geography in storm-tracked events, Colorado, USA
Source: PeerJ. 2018 Nov 21;6:e5961. doi: 10.7717/peerj.5961 (PMC6252068; doi:10.7717/peerj.5961)
Supplement: Supplemental Information 8 — IC and ICP-AES data are separated by boxes. [file peerj-06-5961-s008.xlsx]

## Sheet: Sheet1
IC Data									ICP Data	BDL = Below DL							Detection Limit (DL) (mg/l)
Sample	F-	Cl-	NO2-	Br-	NO3-	PO43-	SO42-		Analyte Name	Detection Limit (DL) (mg/l)	Sunshine 12/07/16	Golden 12/07/16	Golden 11/17/16	Sunshine 1/4/17	Sunshine 1/16/17	Golden 1/4/17	(Different than to left)	Control Filter Filtrate	Golden 05/18/17	Sunshine 05/18/17	Sunshine 4/1/17	Golden 4/4/17	Sunshine 4/4/17
LOQ (limit of quantification)	0.1	0.1	0.1	0.1	0.1	0.5	0.1		Al 308.215-A	0.0205205	BDL	BDL	BDL	BDL	BDL	0.0303087	0.0205205	BDL	BDL	BDL	BDL	BDL	BDL
n.a. = Not detected	(ppm)	(ppm)	(ppm)	(ppm)	(ppm)	(ppm)	(ppm)		As 188.979-A*	0.00467376	BDL	BDL	BDL	BDL	0.00518141	BDL	0.00467376	BDL	BDL	BDL	BDL	BDL	BDL
Golden 11/17/16	n.a.	0.456437	n.a.	n.a.	0.597634	n.a.	0.616955		B 249.772-R	0.0459053	0.150546	0.161373	0.117008	0.0929876	0.0691798	0.053417	0.0459053	0.123856	0.0650955	0.05329	BDL	BDL	BDL
Sunshine 12/07/16	n.a.	<LOQ	<LOQ	n.a.	0.854039	n.a.	<LOQ		Ba 233.527-A*	0.000114919	0.000561582	0.0033189	0.00290553	0.00101912	0.000669999	0.00388551	0.000114919	BDL	0.000294859	0.00103491	0.00015528	BDL	0.000173379
Sunshine 01/03/17	n.a.	<LOQ	0.126935	n.a.	0.564469	n.a.	0.377115		Be 313.107-R	0.000232485	BDL	BDL	BDL	BDL	BDL	BDL	0.000232485	BDL	BDL	BDL	BDL	BDL	BDL
Sunshine 01/16/17	n.a.	0.143369	n.a.	n.a.	0.973295	n.a.	0.471787		Ca 315.887-R*	0.00636781	BDL	0.308818	0.428798	0.00839891	0.0238575	0.472185	0.00636781	0.146922	0.339093	0.175994	0.0940184	0.176965	0.0970575
Golden 12/07/16	n.a.	7.41986	<LOQ	n.a.	2.03354	n.a.	0.398941		Cd 214.440-A	0.000114914	BDL	BDL	BDL	BDL	BDL	BDL	0.000114914	BDL	BDL	BDL	BDL	BDL	BDL
Golden 01/04/17	n.a.	3.02725	0.468942	n.a.	1.30088	n.a.	1.08756		Co 228.616-A	0.000249828	0.00035311	0.000722405	0.000588777	0.000621928	0.000495948	0.000350665	0.000249828	BDL	BDL	BDL	BDL	BDL	BDL
LOQ (Br- differenent than above)	0.1	0.1	0.1	0.5	0.1	0.5	0.1		Cr 205.560-A	0.000340151	BDL	BDL	BDL	BDL	BDL	0.000470461	0.000340151	BDL	BDL	BDL	BDL	BDL	BDL
Control Filter Filtrate	n.a.	0.415703	<LOQ	<LOQ	0.313652	n.a.	0.68868		Cu 324.752-A	0.00109223	BDL	0.0018979	BDL	0.00160121	BDL	0.00135393	0.00109223	BDL	BDL	BDL	BDL	BDL	BDL
Golden 04/04/17	n.a.	0.350113	n.a.	n.a.	0.493568	n.a.	<LOQ		Fe 238.204-A	0.000317805	BDL	BDL	BDL	BDL	BDL	BDL	0.000317805	BDL	BDL	BDL	BDL	BDL	BDL
Golden 05/08/17	n.a.	0.661256	n.a.	<LOQ	n.a.	n.a.	0.824061		K 766.490-R	0.0322807	0.0589435	0.161213	0.173825	0.118681	0.0553786	0.140572	0.0322807	0.0508016	0.0860123	0.0529721	BDL	0.0561041	BDL
Sunshine 04/01/17	n.a.	<LOQ	n.a.	n.a.	1.01174	<LOQ	0.13683		Li 670.784-R	0.00138062	0.00476689	0.00642053	0.00707832	0.00448473	0.00689037	0.00555631	0.00138062	BDL	BDL	BDL	BDL	BDL	BDL
Sunshine 04/04/17	n.a.	0.194015	n.a.	n.a.	0.199858	n.a.	0.40739		Mg 279.553-R	0.000126491	BDL	0.0630323	0.0240154	BDL	0.00528442	0.0659894	0.000126491	0.0123551	0.0579355	0.0172884	BDL	BDL	0.0312991
Sunshine 05/08/17	n.a.	0.13923	n.a.	n.a.	0.444488	n.a.	0.516268		Mg 285.213-R	0.00142411	BDL	0.0614651	0.0245404	BDL	0.00507172	0.0646482	0.00142411	0.0118533	0.0558894	0.0164359	BDL	BDL	0.0300742
									Mn 257.610-A*	4.05449e-05	BDL	BDL	0.0030028	BDL	BDL	0.000322064	4.05449e-05	BDL	BDL	0.0647362	BDL	BDL	BDL
									Na 589.592-R	0.134524	BDL	4.39859	0.303629	BDL	BDL	1.8185	0.134524	0.538305	0.51705	0.166725	BDL	0.213816	0.189501
									Ni 231.604-A	0.000506333	BDL	0.000577611	0.00105531	0.000650785	0.000745783	BDL	0.000506333	BDL	BDL	BDL	BDL	BDL	BDL
									P 177.434-A	0.0105769	BDL	BDL	BDL	BDL	BDL	BDL	0.0105769	BDL	BDL	BDL	BDL	BDL	BDL
									Pb 220.353-A	0.00199696	0.00461589	0.00447125	0.00388592	0.00458174	0.00281346	0.00220359	0.00199696	BDL	BDL	BDL	BDL	BDL	BDL
									S 180.669-A	0.0275844	0.197772	0.311475	0.402391	0.128532	0.237146	0.598697	0.0275844	0.236375	0.268707	0.118305	0.0575426	0.0588866	0.138408
									Se 196.026-A	0.0100131	BDL	BDL	BDL	BDL	BDL	BDL	0.0100131	BDL	BDL	BDL	BDL	BDL	BDL
									Si 251.611-A*	0.0113539	0.0930391	0.138604	0.0955964	0.0595437	0.0536923	0.0520623	0.0113539	0.392398	0.235443	0.18826	0.164452	0.167656	0.171557
									Sr 407.771-R*	0.000108114	BDL	0.00123809	0.00120198	BDL	BDL	0.00154971	0.000108114	BDL	BDL	BDL	BDL	BDL	BDL
									Tl 190.801-A	0.00184998	0.00537245	0.00500205	0.00351519	0.00308333	0.00356879	BDL	0.00184998	BDL	BDL	BDL	BDL	BDL	BDL
									V 292.402-A*	0.000829563	BDL	0.00089791	BDL	BDL	BDL	BDL	0.000829563	BDL	BDL	BDL	BDL	BDL	BDL
									Zn 213.857-A	0.000298329	BDL	0.00533082	0.00683955	BDL	BDL	0.00483236	0.000298329	BDL	BDL	0.041113	BDL	BDL	BDL
									Sn 189.927	0.00169737	BDL	BDL	BDL	BDL	BDL	BDL	0.00169737	BDL	BDL	BDL	BDL	BDL	BDL
									Mo 202.031	0.00104868	BDL	0.00154702	BDL	BDL	BDL	BDL	0.00104868	BDL	BDL	BDL	BDL	BDL	BDL
									Sb 217.582	0.00512136	BDL	BDL	BDL	BDL	BDL	BDL	0.00512136	BDL	BDL	BDL	BDL	BDL	BDL
									Ti 334.940	0.000160649	BDL	BDL	BDL	BDL	BDL	BDL	0.000160649	BDL	BDL	BDL	BDL	BDL	BDL
